# Supplementary material for: Prevention of Colitis-Associated Cancer via Oral Administration of M13-Loaded Lipid Nanoparticles
Source: MDPI journal article supplement (doi:10.3390/pharmaceutics15092331), 2023-09-16
Supplement: s1 [file s1]

## Supplementary Information

### Supplementary figures

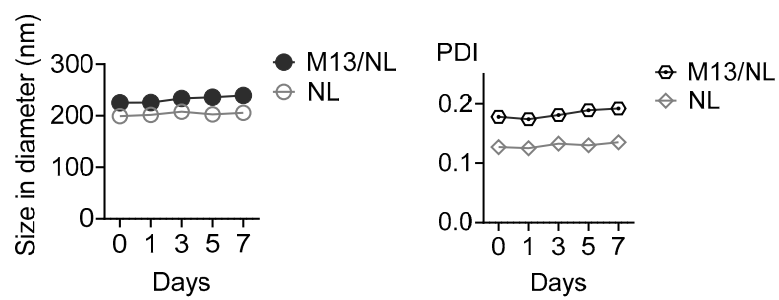

**Figure S1.** Size and PDI characterization of assembled NL and M13-NL.
